# Supplementary material for: Preterm birth in assisted reproduction: the mediating role of hypertensive disorders in pregnancy
Source: PubMed Central journal article supplement — Hum Reprod. 2024 Dec 4;40(1):167–77. doi: 10.1093/humrep/deae261 (PMC11700897; doi:10.1093/humrep/deae261), 2024-12-04
Supplement: deae261_supplementary_figure_s1.pdf [file deae261_supplementary_figure_s1.pdf]

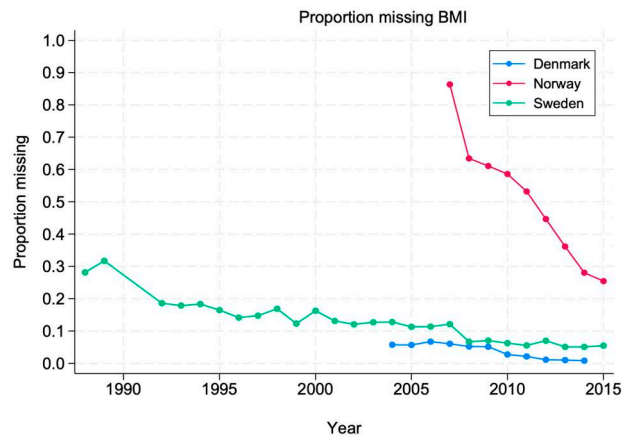

**Supplementary Figure S1. Missing BMI data during the study period.** Proportion of missing data on BMI during the study period. Each country’s graph is restricted to the years when the country recorded height and weight data in the Medical Birth Registry.
