# Supplementary material for: Preterm birth in assisted reproduction: the mediating role of hypertensive disorders in pregnancy
Source: PubMed Central journal article supplement — Hum Reprod. 2024 Dec 4;40(1):167–77. doi: 10.1093/humrep/deae261 (PMC11700897; doi:10.1093/humrep/deae261), 2024-12-04
Supplement: deae261_supplementary_figure_s2.pdf [file deae261_supplementary_figure_s2.pdf]

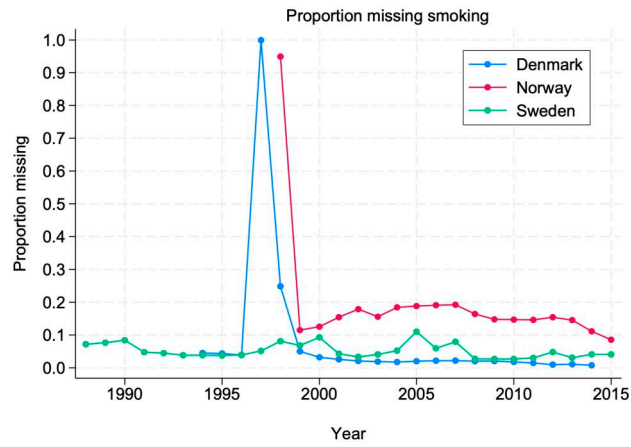

**Supplementary Figure S2. Missing smoking data during the study period.** Proportion of missing data on smoking during the study period. Each country's graph is restricted to the years when the country recorded smoking data in the Medical Birth Registry.
