# Supplementary material for: Preterm birth in assisted reproduction: the mediating role of hypertensive disorders in pregnancy
Source: PubMed Central journal article supplement — Hum Reprod. 2024 Dec 4;40(1):167–77. doi: 10.1093/humrep/deae261 (PMC11700897; doi:10.1093/humrep/deae261), 2024-12-04
Supplement: deae261_supplementary_figure_s3.pdf [file deae261_supplementary_figure_s3.pdf]

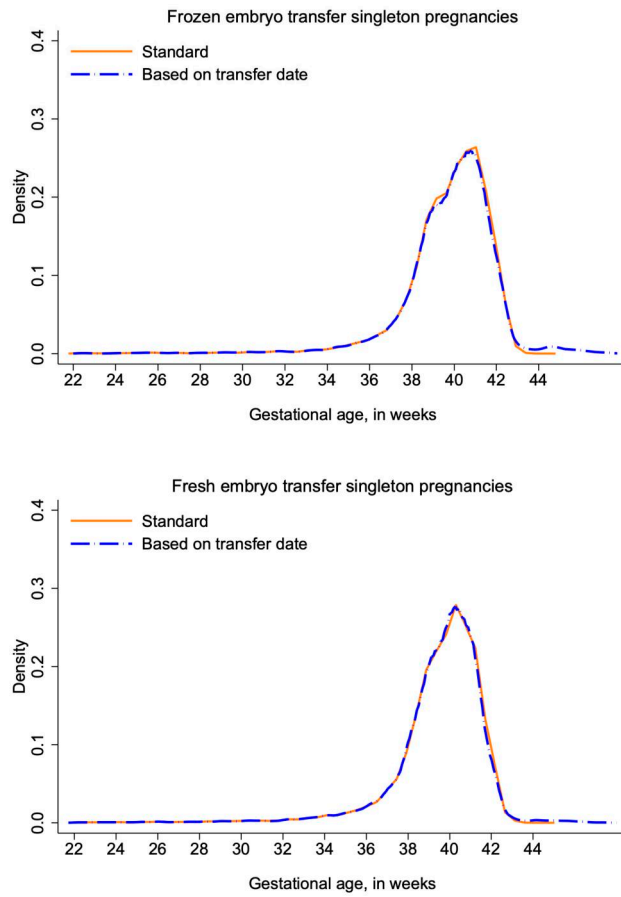

Supplementary Figure S3. Distributions of gestational age, estimated using either embryo transfer date or ultrasound examination (standard).
