# Supplementary material for: Preterm birth in assisted reproduction: the mediating role of hypertensive disorders in pregnancy
Source: PubMed Central journal article supplement — Hum Reprod. 2024 Dec 4;40(1):167–77. doi: 10.1093/humrep/deae261 (PMC11700897; doi:10.1093/humrep/deae261), 2024-12-04
Supplement: deae261_supplementary_table_s1.pdf [file deae261_supplementary_table_s1.pdf]

**Supplementary Table S1.** Overview of coding systems in use in the Nordic countries during the study period and selection of relevant codes from each system.

|                                                       | International Statistical Classification of Diseases and related Health Problems (ICD) classification version |                     |                                 | Country            |                                           |                                                               |
|-------------------------------------------------------|---------------------------------------------------------------------------------------------------------------|---------------------|---------------------------------|--------------------|-------------------------------------------|---------------------------------------------------------------|
|                                                       | ICD-8                                                                                                         | ICD-9               | ICD-10                          | Denmark            | Norway                                    | Sweden                                                        |
| <b>Registration practices</b>                         |                                                                                                               |                     |                                 |                    |                                           |                                                               |
| Spontaneous preterm birth (Gestational age <259 days) | –                                                                                                             | 644.0–1, 658.1      | O42.0, O42.1, O42.9, O47, O60.1 | ICD-10 (1994–2014) | Checkbox (1988–2015)                      | ICD-9 (1988–1996), ICD-10 (1997–2015)<br>Checkbox (1991–2015) |
| Hypertensive disorders in pregnancy                   | 637                                                                                                           | 642.3–7             | O11, O13–16                     | ICD-10 (1994–2014) | ICD-8 (1988–1998)<br>Checkbox (1999–2015) | ICD-9 (1988–1996), ICD-10 (1997–2015)                         |
| Preeclampsia                                          | 637                                                                                                           | 642.4–7             | O11, O14–16                     | ICD-10 (1994–2014) | ICD-8 (1988–1998)<br>Checkbox (1999–2015) | ICD-9 (1988–1996), ICD-10 (1997–2015)                         |
| Placental abruption                                   | 632.1                                                                                                         | 641.2               | O45                             | ICD-10 (1994–2014) | ICD-8 (1988–1998)<br>Checkbox (1999–2015) | ICD-9 (1988–1996), ICD-10 (1997–2015)                         |
| Any diabetes (type 1, type 2, and gestational)        | 250                                                                                                           | 250<br>648.0, 648.8 | E10–E14,<br>O24.4, O24.9        | ICD-10 (1994–2014) | ICD-8 (1988–1998)<br>Checkbox (1999–2015) | ICD-9 (1988–1996), ICD-10 (1997–2015)                         |
