# Supplementary material for: Preterm birth in assisted reproduction: the mediating role of hypertensive disorders in pregnancy
Source: PubMed Central journal article supplement — Hum Reprod. 2024 Dec 4;40(1):167–77. doi: 10.1093/humrep/deae261 (PMC11700897; doi:10.1093/humrep/deae261), 2024-12-04
Supplement: deae261_supplementary_table_s2.pdf [file deae261_supplementary_table_s2.pdf]

**Supplementary Table S2.** Risk of preterm birth according to conception method and diagnosis of HDP<sup>a</sup> in the main sample.

|                           | Cases of preterm birth/deliveries (%) |                          | Odds ratio of preterm birth in pregnancies with HDP versus without HDP |                                   |
|---------------------------|---------------------------------------|--------------------------|------------------------------------------------------------------------|-----------------------------------|
|                           | Pregnancies with HDP                  | Pregnancies without HDP  | Unadjusted OR (95% CI)                                                 | Adjusted OR <sup>b</sup> (95% CI) |
| <b>Natural conception</b> | 33 581/191 287 (17.6%)                | 185 873/4 235 394 (4.4%) | 4.64 (4.58 to 4.70)                                                    | 4.31 (4.25 to 4.37)               |
| <b>Frozen-ET</b>          | 239/1326 (18.0%)                      | 959/16 711 (5.7%)        | 3.61 (3.09 to 4.22)                                                    | 3.43 (2.93 to 4.02)               |
| <b>Fresh-ET</b>           | 935/4600 (20.3%)                      | 5416/73 700 (7.4%)       | 3.22 (2.98 to 3.47)                                                    | 3.16 (2.93 to 3.42)               |
| <b>Total</b>              | 34 755/197 214 (17.6%)                | 192 248/4 325 805 (4.4%) | 4.60 (4.54 to 4.66)                                                    | 4.27 (4.21 to 4.32)               |

<sup>a</sup> Hypertensive disorders in pregnancy, i.e. gestational hypertension, preeclampsia, eclampsia, or chronic hypertension with superimposed preeclampsia.

<sup>b</sup> Adjusted for year of delivery, maternal age, parity, and country.
