# Supplementary material for: Preterm birth in assisted reproduction: the mediating role of hypertensive disorders in pregnancy
Source: PubMed Central journal article supplement — Hum Reprod. 2024 Dec 4;40(1):167–77. doi: 10.1093/humrep/deae261 (PMC11700897; doi:10.1093/humrep/deae261), 2024-12-04
Supplement: deae261_supplementary_table_s3.pdf [file deae261_supplementary_table_s3.pdf]

**Supplementary Table S3.** Sensitivity analyses. Effect of frozen-ET and fresh-ET on preterm birth overall (total), through HDP<sup>a</sup> (mediated) and independent of HDP<sup>a</sup> (direct). Odds ratios (OR) with 95% confidence intervals.

|                                   | Cases of preterm birth/deliveries (%) | Total effect OR <sup>b</sup>     | Direct effect OR <sup>b</sup>    | Mediated OR <sup>b</sup>            | % Mediated <sup>c</sup> |
|-----------------------------------|---------------------------------------|----------------------------------|----------------------------------|-------------------------------------|-------------------------|
| <b>Natural conception</b>         |                                       |                                  |                                  |                                     |                         |
| Main sample                       | 219 454/4 426 682 (5.0%)              | 1.00 (Ref.)                      | 1.00 (Ref.)                      | 1.00 (Ref.)                         | –                       |
| BMI & smoking sample              | 117 705/2 554 102 (4.6%)              | 1.00 (Ref.)                      | 1.00 (Ref.)                      | 1.00 (Ref.)                         | –                       |
| Diabetes sample                   | 219 454/4 426 682 (5.0%)              | 1.00 (Ref.)                      | 1.00 (Ref.)                      | 1.00 (Ref.)                         | –                       |
| Primiparous sample                | 136 564/2 265 207 (6.0%)              | 1.00 (Ref.)                      | 1.00 (Ref.)                      | 1.00 (Ref.)                         | –                       |
| IVF (≠ ICSI)                      | 219 454/4 426 682 (5.0%)              | 1.00 (Ref.)                      | 1.00 (Ref.)                      | 1.00 (Ref.)                         | –                       |
| Partner sperm sample <sup>d</sup> | 157 828/3 228 532 (4.9%)              | 1.00 (Ref.)                      | 1.00 (Ref.)                      | 1.00 (Ref.)                         | –                       |
| Single embryo transfer            | 219 461/4 426 682 (5.0%)              | 1.00 (Ref.)                      | 1.00 (Ref.)                      | 1.00 (Ref.)                         | –                       |
| Blastocyst transfer               | 116 045/1 534 104 (4.7%)              | 1.00 (Ref.)                      | 1.00 (Ref.)                      | 1.00 (Ref.)                         | –                       |
| <b>Frozen-ET</b>                  |                                       |                                  |                                  |                                     |                         |
| Main sample                       | 1198/18 037 (6.6%)                    | 1.29 (1.21 to 1.37)              | 1.23 (1.16 to 1.30)              | 1.045 (1.044 to 1.046)              | 20.7                    |
| BMI & smoking sample              | 901/14 355 (6.3%)                     | 1.29 <sup>e</sup> (1.20 to 1.38) | 1.24 <sup>e</sup> (1.20 to 1.28) | 1.039 <sup>e</sup> (1.038 to 1.040) | 16.9                    |
| Diabetes sample                   | 1198/18 037 (6.6%)                    | 1.29 (1.21 to 1.36)              | 1.23 (1.19 to 1.27)              | 1.046 (1.045 to 1.047)              | 19.9                    |
| Primiparous sample                | 799/10 454 (7.6%)                     | 1.24 (1.16 to 1.34)              | 1.18 (1.13 to 1.22)              | 1.058 (1.056 to 1.060)              | 28.0                    |
| IVF (≠ ICSI)                      | 667/9846 (6.8%)                       | 1.29 (1.19 to 1.40)              | 1.23 (1.18 to 1.28)              | 1.053 (1.052 to 1.054)              | 22.3                    |
| Partner sperm sample <sup>d</sup> | 703/10 870 (6.5%)                     | 1.23 (1.14 to 1.33)              | 1.19 (1.14 to 1.24)              | 1.038 (1.037 to 1.039)              | 19.2                    |
| Single embryo transfer            | 757/11 605 (6.5%)                     | 1.29 (1.20 to 1.39)              | 1.23 (1.18 to 1.27)              | 1.053 (1.052 to 1.054)              | 22.2                    |
| Blastocyst transfer               | 264/3729 (7.1%)                       | 1.41 (1.24 to 1.61)              | 1.35 (1.27 to 1.44)              | 1.044 (1.042 to 1.045)              | 14.3                    |
| <b>Fresh-ET</b>                   |                                       |                                  |                                  |                                     |                         |
| Main sample                       | 6351/78 300 (8.1%)                    | 1.49 (1.45 to 1.53)              | 1.48 (1.44 to 1.52)              | 1.002 (1.000 to 1.003)              | 0.5                     |
| BMI & smoking sample              | 4068/53 165 (7.7%)                    | 1.49 <sup>e</sup> (1.44 to 1.54) | 1.50 <sup>e</sup> (1.45 to 1.55) | 0.998 <sup>e</sup> (0.996 to 0.999) | <0 <sup>f</sup>         |
| Diabetes sample                   | 6351/78 300 (8.1%)                    | 1.47 (1.44 to 1.52)              | 1.48 (1.43 to 1.51)              | 1.000 (0.999 to 1.002)              | 0.2                     |
| Primiparous sample                | 5002/58 919 (8.5%)                    | 1.39 (1.34 to 1.43)              | 1.38 (1.34 to 1.43)              | 1.001 (0.999 to 1.003)              | 0.4                     |
| IVF (≠ ICSI)                      | 3912/44 602 (8.8%)                    | 1.59 (1.54 to 1.65)              | 1.60 (1.54 to 1.65)              | 0.998 (0.996 to 1.000)              | <0 <sup>e</sup>         |
| Partner sperm sample <sup>d</sup> | 2836/35 729 (7.9%)                    | 1.43 (1.38 to 1.49)              | 1.43 (1.37 to 1.49)              | 1.004 (1.002 to 1.005)              | 1.2                     |
| Single embryo transfer            | 2920/37 082 (7.9%)                    | 1.49 (1.43 to 1.55)              | 1.49 (1.43 to 1.55)              | 1.000 (0.998 to 1.002)              | <0 <sup>f</sup>         |
| Blastocyst transfer               | 347/4214 (8.2%)                       | 1.66 (1.48 to 1.85)              | 1.67 (1.49 to 1.87)              | 0.993 (0.987 to 0.999)              | <0 <sup>f</sup>         |

Models are adjusted for year of delivery, maternal age, parity, and country.

<sup>a</sup> Hypertensive disorders in pregnancy, i.e. gestational hypertension, preeclampsia, eclampsia, or chronic hypertension with superimposed preeclampsia.

<sup>b</sup> The total effect decomposes into the product of the direct effect odds ratio and the mediated effect odds ratio.

<sup>c</sup> Proportion mediated =  $DE \times (ME - 1) / (DE \times ME - 1)$ , where DE is direct effect and ME is mediated effect.

<sup>d</sup> Data only available in Denmark and Sweden.

<sup>e</sup> Also adjusted for BMI as a categorical variable (underweight <18.5 kg/m<sup>2</sup>, normal 18.5–24.9 kg/m<sup>2</sup>, overweight 25–29.9 kg/m<sup>2</sup>, or obese ≥30 kg/m<sup>2</sup>) and smoking status as a dichotomous variable (yes/no).

<sup>f</sup> Note that when all or none of the effect is mediated (i.e. no statistically significant direct or mediated effect, respectively), the proportion mediated may be estimated outside of 0–100% due to random variability.
