# Supplementary material for: Preterm birth in assisted reproduction: the mediating role of hypertensive disorders in pregnancy
Source: PubMed Central journal article supplement — Hum Reprod. 2024 Dec 4;40(1):167–77. doi: 10.1093/humrep/deae261 (PMC11700897; doi:10.1093/humrep/deae261), 2024-12-04
Supplement: deae261_supplementary_table_s4.pdf [file deae261_supplementary_table_s4.pdf]

**Supplementary Table S4.** Effect of frozen-ET and fresh-ET on preterm birth (using transfer date as basis for gestational age in the ART pregnancies) overall (total), through HDP<sup>a</sup> (mediated) and independent of HDP<sup>a</sup> (direct). Odds ratios (OR) with 95% CIs.

|                                                                     | Cases/deliveries (%)     | Total effect OR <sup>b</sup> | Direct effect OR <sup>b</sup> | Mediated OR <sup>b</sup> | % Mediated <sup>c</sup> |
|---------------------------------------------------------------------|--------------------------|------------------------------|-------------------------------|--------------------------|-------------------------|
| <i>Any preterm birth (&lt;37 weeks)</i>                             |                          |                              |                               |                          |                         |
| <b>Natural conception</b>                                           | 219 454/4 426 682 (5.0%) | 1.00 (Ref.)                  | 1.00 (Ref.)                   | 1.00 (Ref.)              | –                       |
| <b>Frozen-ET</b>                                                    | 1195/18 037 (6.6%)       | 1.28 (1.28 to 1.36)          | 1.22 (1.19 to 1.26)           | 1.048 (1.048 to 1.049)   | 20.9                    |
| <b>Fresh-ET</b>                                                     | 6359/78 300 (8.1%)       | 1.49 (1.45 to 1.53)          | 1.49 (1.44 to 1.53)           | 1.001 (1.000 to 1.003)   | 0.5                     |
| <i>Spontaneous preterm birth (&lt;37 weeks)<sup>d</sup></i>         |                          |                              |                               |                          |                         |
| <b>Natural conception</b>                                           | 139 894/4 267 470 (3.3%) | 1.00 (Ref.)                  | 1.00 (Ref.)                   | 1.00 (Ref.)              | –                       |
| <b>Frozen-ET</b>                                                    | 700/18 033 (3.9%)        | 1.18 (1.09 to 1.27)          | 1.17 (1.13 to 1.22)           | 1.003 (1.001 to 1.005)   | 2.1                     |
| <b>Fresh-ET</b>                                                     | 3668/78 003 (4.7%)       | 1.34 (1.29 to 1.39)          | 1.34 (1.29 to 1.39)           | 1.000 (0.999 to 1.001)   | 0                       |
| <i>Medically indicated preterm birth (&lt;37 weeks)<sup>d</sup></i> |                          |                              |                               |                          |                         |
| <b>Natural conception</b>                                           | 69 767/4 267 470 (1.6%)  | 1.00 (Ref.)                  | 1.00 (Ref.)                   | 1.00 (Ref.)              | –                       |
| <b>Frozen-ET</b>                                                    | 494/18 033 (2.7%)        | 1.48 (1.34 to 1.62)          | 1.30 (1.24 to 1.36)           | 1.136 (1.133 to 1.138)   | 37.1                    |
| <b>Fresh-ET</b>                                                     | 2640/78 003 (3.4%)       | 1.71 (1.64 to 1.79)          | 1.71 (1.64 to 1.78)           | 1.005 (1.003 to 1.006)   | 1.1                     |
| <i>Extremely or very preterm birth (&lt;32 weeks)</i>               |                          |                              |                               |                          |                         |
| <b>Natural conception</b>                                           | 31 634/4 426 682 (0.7%)  | 1.00 (Ref.)                  | 1.00 (Ref.)                   | 1.00 (Ref.)              | –                       |
| <b>Frozen-ET</b>                                                    | 224/18 037 (1.2%)        | 1.49 (1.30 to 1.70)          | 1.38 (1.29 to 1.48)           | 1.074 (1.072 to 1.077)   | 21.2                    |
| <b>Fresh-ET</b>                                                     | 1221/78 300 (1.6%)       | 1.78 (1.68 to 1.89)          | 1.78 (1.68 to 1.89)           | 1.002 (1.001 to 1.004)   | 0.6                     |
| <i>Extremely preterm birth (&lt;28 weeks)</i>                       |                          |                              |                               |                          |                         |
| <b>Natural conception</b>                                           | 10 423/4 426 682 (0.2%)  | 1.00 (Ref.)                  | 1.00 (Ref.)                   | 1.00 (Ref.)              | –                       |
| <b>Frozen-ET</b>                                                    | 90/18 037 (0.5%)         | 1.68 (1.37 to 2.08)          | 1.61 (1.45 to 1.79)           | 1.047 (1.044 to 1.050)   | 11.1                    |
| <b>Fresh-ET</b>                                                     | 453/78 300 (0.6%)        | 1.96 (1.78 to 2.16)          | 1.96 (1.78 to 2.16)           | 1.002 (1.000 to 1.003)   | 0.3                     |

Models are adjusted for year of delivery, maternal age, parity, and country.

<sup>a</sup> Hypertensive disorders in pregnancy, i.e. gestational hypertension, preeclampsia, eclampsia, or chronic hypertension with superimposed preeclampsia.

<sup>b</sup> The total effect decomposes into the product of the direct effect odds ratio and the mediated effect odds ratio.

<sup>c</sup> Proportion mediated = DE × (ME – 1)/(DE × ME – 1), where DE is direct effect and ME is mediated effect.

<sup>d</sup> For Sweden, the study population was restricted to deliveries 1991–2015.

Models are adjusted for year of delivery, maternal age, parity, and country.
